# Supplementary material
Source: MDPI journal article supplement (https://www.mdpi.com/2073-4441/15/14/2548)
Supplement: s1 [file s1]

**Enhancement of microbial and metabolic mechanisms in an aerobic bioreactor  
with immobilized microflora by simple and complex electron donors**

Qinghui Deng, Keju Wang, Wang Xu, Xinfan Yu, Jie Feng, Shuangfei Li, Huirong  
Chen

Corresponding author: Huirong Chen (Chenhr@szu.edu.cn)

Affiliation: Shenzhen Key Laboratory of Marine Bioresource & Eco-environmental  
Sciences, College of Life Sciences and Oceanography, Shenzhen University,  
Shenzhen, 518071, China

**Table S1** Alpha Diversity Statistics of different samples

| Sample | Shannon | chao1    | observed species | PD whole tree |
|--------|---------|----------|------------------|---------------|
| AS1-1  | 3.4277  | 623.5    | 556              | 36.7217       |
| AS1-2  | 3.1697  | 682.0574 | 600              | 39.0487       |
| AS1-3  | 3.2112  | 651.0811 | 572              | 38.8872       |
| AS7-1  | 3.777   | 542.2143 | 455              | 32.6993       |
| AS7-2  | 4.2201  | 700.6    | 607              | 41.0423       |
| AS7-3  | 5.1828  | 771.2959 | 679              | 42.1885       |
| BS1-1  | 4.2151  | 817.25   | 726              | 50.0964       |
| BS1-2  | 4.06    | 773      | 702              | 44.5495       |
| BS1-3  | 4.3244  | 766.4576 | 684              | 45.9731       |
| BS7-1  | 6.1407  | 805.1135 | 792              | 50.1924       |
| BS7-2  | 6.4204  | 1172.66  | 1090             | 62.798        |
| BS7-3  | 7.0871  | 1316.07  | 1211             | 62.6754       |

**Table S2** Microbial difference between AS1 group and AS7 group in genus level

| Taxa                  | Mean (AS1) | Mean (AS7) | p value | q value | diff |
|-----------------------|------------|------------|---------|---------|------|
| <i>Acinetobacter</i>  | 0.452      | 0.1016     | 0.0081  | 0.3561  | down |
| <i>Aquaspirillum</i>  | 0.4213     | 0.1686     | 0.02    | 0.4469  | down |
| <i>Alishewanella</i>  | 0.004      | 0.0891     | 0.0186  | 0.4409  | up   |
| <i>Azonexus</i>       | 0.0024     | 0.0457     | 0.0095  | 0.3561  | up   |
| <i>Hydrogenophaga</i> | 0.0015     | 0.022      | 0.0104  | 0.3561  | up   |
| <i>Brevundimonas</i>  | 0.0006     | 0.0079     | 0.0005  | 0.1481  | up   |
| <i>Dechloromonas</i>  | 0.0037     | 0.0128     | 0.0251  | 0.493   | up   |
| <i>Erysipelothrix</i> | 0.001      | 0.0115     | 0.0114  | 0.3691  | up   |
| <i>Paracoccus</i>     | 0.0006     | 0.0088     | 0.0067  | 0.3561  | up   |
| <i>Rhodobacter</i>    | 0.0009     | 0.0125     | 0.0144  | 0.4149  | up   |
| <i>Flavobacterium</i> | 0.0000629  | 0.0082     | 0.01    | 0.3561  | up   |
| <i>Azoarcus</i>       | 0.0015     | 0.012      | 0.0018  | 0.237   | up   |
| <i>Thauera</i>        | 0.0004     | 0.0051     | 0.0152  | 0.4149  | up   |

**Table S3** Microbial difference between BS1 group and BS7 group in genus level

| Taxa                   | Mean (BS1) | Mean (BS7) | p value | q value | diff |
|------------------------|------------|------------|---------|---------|------|
| <i>Acinetobacter</i>   | 0.861      | 0.2333     | 0.0028  | 0.1228  | down |
| <i>Aquaspirillum</i>   | 0.0028     | 0.0096     | 0.0101  | 0.1518  | up   |
| <i>Alishewanella</i>   | 0.0005     | 0.0235     | 0.009   | 0.15    | up   |
| <i>Azonexus</i>        | 0.0009     | 0.0778     | 0.0053  | 0.1284  | up   |
| <i>Pedobacter</i>      | 0.0004     | 0.0413     | 0.0153  | 0.1708  | up   |
| <i>Hydrogenophaga</i>  | 0.0008     | 0.034      | 0.0011  | 0.1081  | up   |
| <i>Brevundimonas</i>   | 0.0007     | 0.0213     | 0.0025  | 0.1216  | up   |
| <i>Dechloromonas</i>   | 0.0007     | 0.0189     | 0.0042  | 0.1267  | up   |
| <i>Erysipelothrix</i>  | 0.0006     | 0.0205     | 0.0008  | 0.1013  | up   |
| <i>Paracoccus</i>      | 0.0004     | 0.0179     | 0.0059  | 0.129   | up   |
| <i>Rhodobacter</i>     | 0.0003     | 0.0191     | 0.0031  | 0.1238  | up   |
| <i>Pseudomonas</i>     | 0.0058     | 0.0081     | 0.0363  | 0.2274  | up   |
| <i>Flavobacterium</i>  | 0.0003     | 0.0131     | 0.0151  | 0.1708  | up   |
| <i>Azoarcus</i>        | 0.0002     | 0.0061     | 0.0006  | 0.0901  | up   |
| <i>Hyphomonas</i>      | 0.0002     | 0.0103     | 0.0093  | 0.15    | up   |
| <i>Gemmobacter</i>     | 0.0009     | 0.0098     | 0.0045  | 0.1272  | up   |
| <i>Marivita</i>        | 0.0017     | 0.0082     | 0.0047  | 0.1276  | up   |
| <i>Sphingopyxis</i>    | 0.0003     | 0.0066     | 0.0159  | 0.1708  | up   |
| <i>Acidovorax</i>      | 0.001      | 0.0063     | 0.0003  | 0.0676  | up   |
| <i>Cloacibacterium</i> | 0.0005     | 0.0059     | 0.0039  | 0.1261  | up   |

**Table S4** Microbial difference between AS1 group and BS1 group in genus level

| Taxa                 | Mean (AS1) | Mean (BS1) | p value | q value | diff |
|----------------------|------------|------------|---------|---------|------|
| <i>Acinetobacter</i> | 0.452      | 0.861      | 0.0033  | 0.3337  | up   |
| <i>Aquaspirillum</i> | 0.4213     | 0.0028     | 0.0017  | 0.3337  | down |

**Table S5** Microbial difference between AS7 group and BS7 group in genus level

| Taxa                   | Mean (AS7) | Mean (BS7) | p value | q value | diff |
|------------------------|------------|------------|---------|---------|------|
| <i>Aquaspirillum</i>   | 0.1686     | 0.0096     | 0.0107  | 0.1812  | down |
| <i>Alishewanella</i>   | 0.0891     | 0.0235     | 0.0207  | 0.2276  | down |
| <i>Azoarcus</i>        | 0.012      | 0.0061     | 0.003   | 0.1084  | down |
| <i>Azonexus</i>        | 0.0457     | 0.0778     | 0.0274  | 0.2503  | up   |
| <i>Hydrogenophaga</i>  | 0.022      | 0.034      | 0.0263  | 0.2478  | up   |
| <i>Brevundimonas</i>   | 0.0079     | 0.0213     | 0.0027  | 0.1075  | up   |
| <i>Dechloromonas</i>   | 0.0128     | 0.0189     | 0.0479  | 0.2691  | up   |
| <i>Erysipelothrix</i>  | 0.0115     | 0.0205     | 0.015   | 0.212   | up   |
| <i>Paracoccus</i>      | 0.0088     | 0.0179     | 0.0183  | 0.2187  | up   |
| <i>Rhodobacter</i>     | 0.0125     | 0.0191     | 0.0444  | 0.2691  | up   |
| <i>Pedobacter</i>      | 0.0024     | 0.0413     | 0.0124  | 0.1931  | up   |
| <i>Sphingopyxis</i>    | 0.0004     | 0.0066     | 0.0129  | 0.1931  | up   |
| <i>Fusibacter</i>      | 0.0028     | 0.0092     | 0.0433  | 0.2691  | up   |
| <i>Hyphomonas</i>      | 0.0013     | 0.0103     | 0.0051  | 0.1401  | up   |
| <i>Gemmobacter</i>     | 0.0046     | 0.0098     | 0.0099  | 0.1812  | up   |
| <i>Marivita</i>        | 0.0029     | 0.0082     | 0.0097  | 0.1812  | up   |
| <i>Acinetobacter</i>   | 0.1016     | 0.2333     | 0.0473  | 0.2691  | up   |
| <i>Acidovorax</i>      | 0.0034     | 0.0063     | 0.0132  | 0.1931  | up   |
| <i>Cloacibacterium</i> | 0.0022     | 0.0059     | 0.0042  | 0.1312  | up   |

Red marked species were up regulated in Table S2, blue marked species were chosen as characteristic species of BS7.

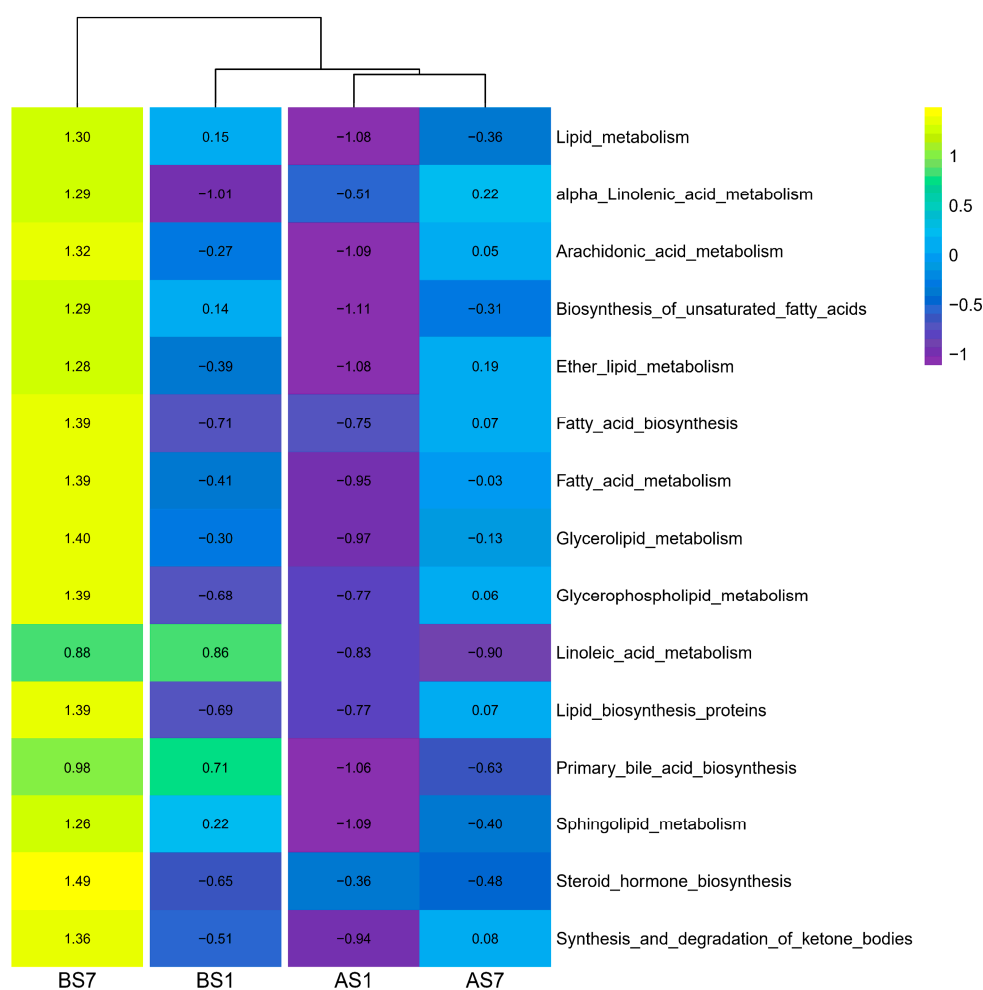

**Figure S1** Heatmap showing clustering among different samples based on relative abundance of lipid metabolisms from KEGG database.

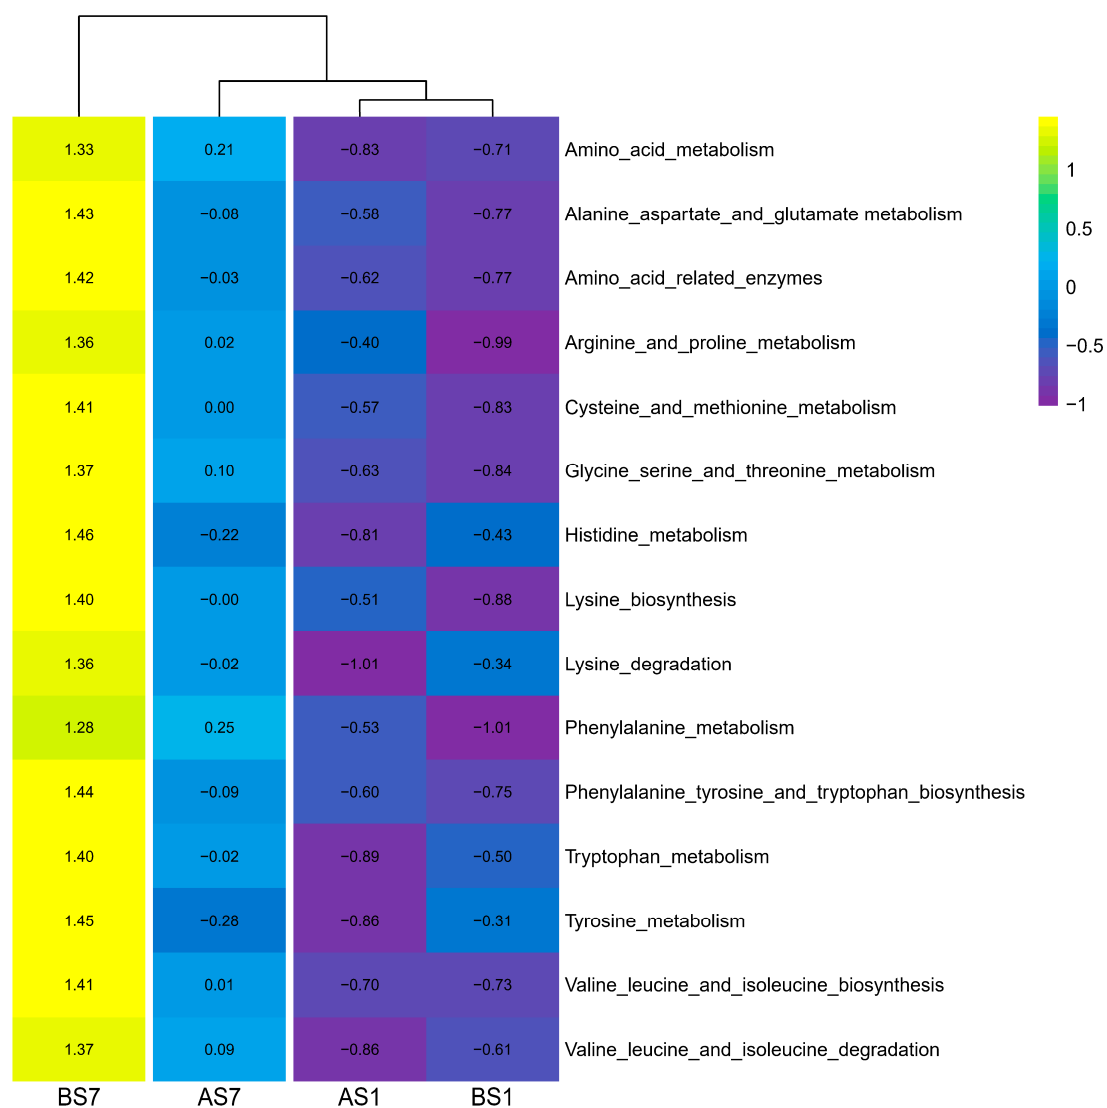

**Figure S2** Heatmap showing clustering among different samples based on relative abundance of amino acid metabolisms from KEGG database.



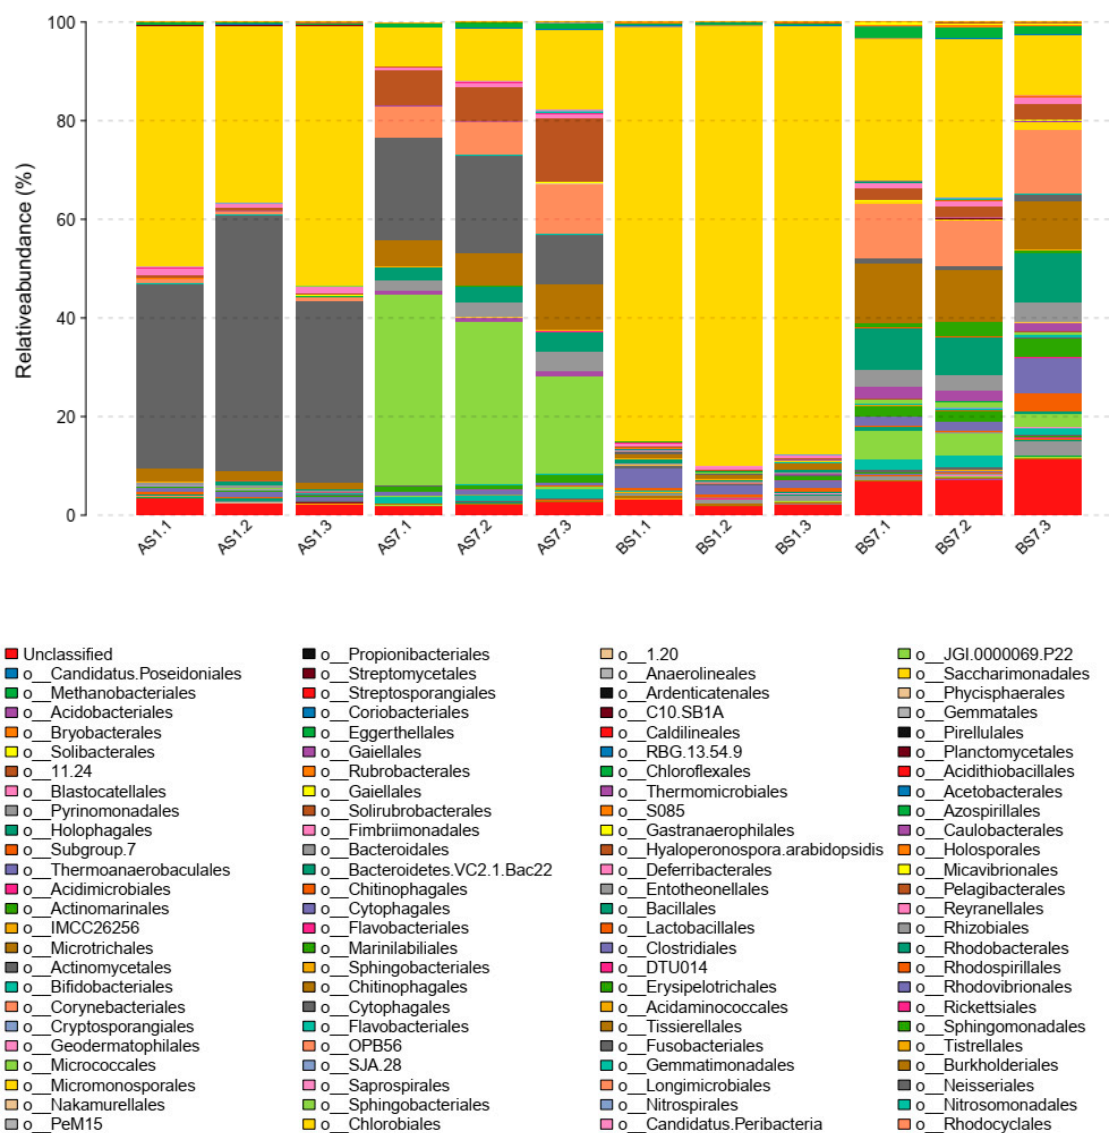

**Figure S3** Stacked column chart of relative abundance in the activated sludges at the order level.

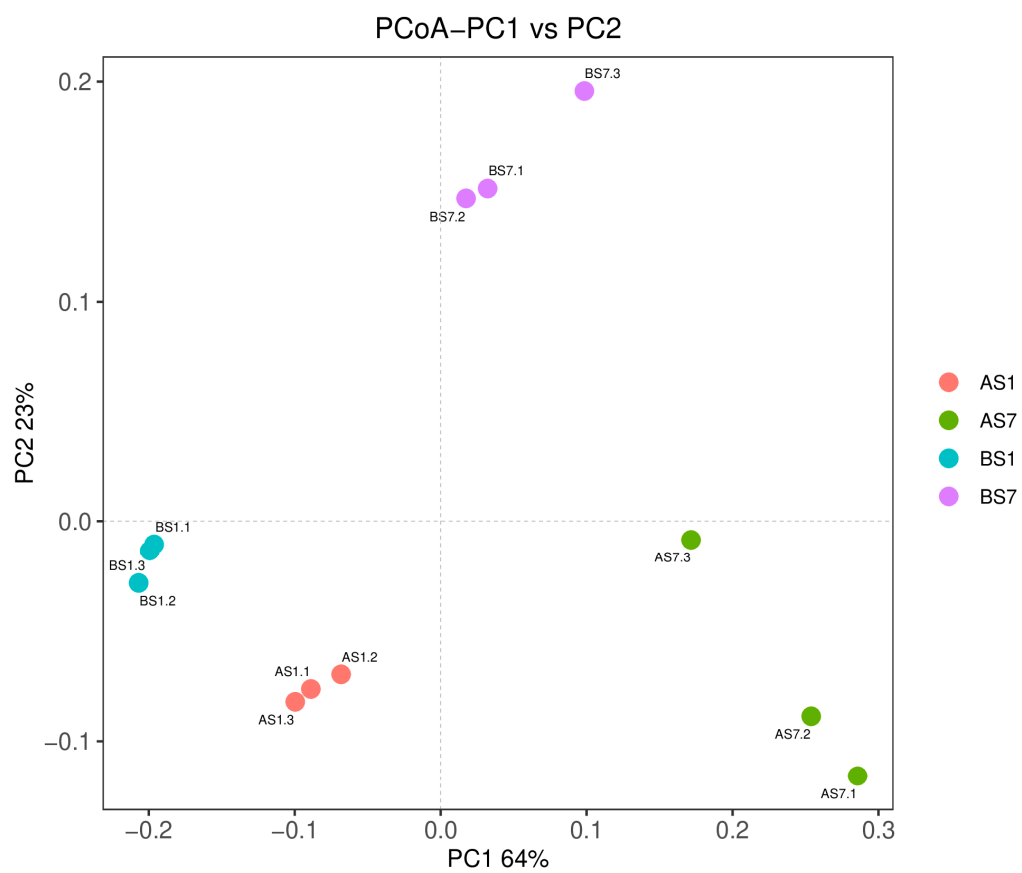

**Figure S4** PCoA analysis of different sample groups based on weighted unifracc.
